# Supplementary material for: Efficient and sustainable production ofp-xylene from biomass-derived 2,5-dimethylfuran and ethylene using alkali metal doped phosphotungstic acid catalysts
Source: Royal Society of Chemistry journal article supplement (doi:10.1039/d2se00863g), 2022-01-01
Supplement: d2se00863g1.pdf [file d2se00863g1.pdf]

Supplementary material

**Efficient and sustainable production of *p*-xylene from biomass-derived 2,5-dimethylfuran and ethylene using alkali metal doped phosphotungstic acid catalysts**

Chengming Wu, Zhao Yang, Jifan Li, Chun-Ling Liu, Wen-Sheng Dong\*

*Key Laboratory of Applied Surface and Colloid Chemistry (SNNU), MOE, School of Chemistry and Chemical Engineering, Shaanxi Normal University, Xi'an 710062, China*

\*Corresponding author.

E-mail address: [wsdong@snnu.edu.cn](mailto:wsdong@snnu.edu.cn).

**Fig. S1.** N<sub>2</sub> adsorption-desorption isotherms of the pure HPW and M<sub>x</sub>H<sub>3-x</sub>PW catalysts.

**Fig. S2.** Effect of initial ethylene pressure on the conversion of DMF and ethylene to PX. (Reaction conditions: DMF, 1.15 g; 1,4-dioxane, 14.3 g; catalyst, 12.5wt% DMF; 250 °C for 6 h; stirring speed, 800 rpm.)

Notation: CH: 1,4-dimethyl-7-oxabicyclo[2.2.1]hept-2-ene; AP: 1-methyl-4-propylbenzene; CP: 3-methyl-2-cyclopentenone; HDO: 2,5-hexanedione; DM: dimers; Others: undetectable byproducts by the GC.

**Fig. S3.** Effect of catalyst dosage on the conversion of DMF and ethylene to PX. (Reaction conditions: DMF, 1.15 g; 1,4-dioxane, 14.3 g; 4 MPa C<sub>2</sub>H<sub>4</sub>; 250 °C for 6 h; stirring speed, 800 rpm.) Notation: CH: 1,4-dimethyl-7-oxabicyclo[2.2.1]hept-2-ene; AP: 1-methyl-4-propylbenzene; CP: 3-methyl-2-cyclopentenone; HDO: 2,5-hexanedione; DM: dimers; Others: undetectable byproducts by the GC.

**Fig. S4.** Effect of reaction temperature and time on the HDO and AP selectivity (a), DM and CP selectivity (b), carbon balance (c). (Reaction conditions: DMF, 1.15 g; 1,4-dioxane, 14.3 g; catalyst, 12.5wt% DMF; 4 MPa C<sub>2</sub>H<sub>4</sub>, stirring speed, 800 rpm.)

Notation: HDO: 2,5-hexanedione; AP: 1-methyl-4-propylbenzene; CP: 3-methyl-2-cyclopentenone; DM: dimers; Others: undetectable byproducts by the GC.

**Fig. S5.** Effect of water content on the conversion of DMF and ethylene to PX. (Reaction conditions: DMF, 1.15 g; 1,4-dioxane, 14.3 g; catalyst, 12.5wt% DMF; 4 MPa C<sub>2</sub>H<sub>4</sub>; 250 °C for 6 h; stirring speed, 800 rpm.)

**Table S1** A summary of various catalysts for the conversion of DMF and ethylene to PX.

| Catalyst                                         | DMF concentration (M) | Solvent     | T (°C) | Time (h) | X <sub>DMF</sub> (%) <sup>a</sup> | Y <sub>PX</sub> (%) <sup>b</sup> | Catalyst stability                 | Ref.      |
|--------------------------------------------------|-----------------------|-------------|--------|----------|-----------------------------------|----------------------------------|------------------------------------|-----------|
| Cs <sub>1</sub> H <sub>2</sub> PW                | 0.80                  | 1,4-dioxane | 250    | 6        | 86.8                              | 60.4                             | stable                             | This work |
|                                                  |                       |             | 250    | 8        | 91.8                              | 64.0                             | stable                             | This work |
| SiO <sub>2</sub> -SO <sub>3</sub> H              | 1.04                  | n-heptane   | 250    | 6        | 67.0                              | 56.6                             | ~26% activity loss in the next run | 1         |
| H <sub>3</sub> PO <sub>4</sub> /TiO <sub>2</sub> | 0.88                  | n-dodecane  | 250    | 6        | 80.0                              | 56.8                             | ~20% activity loss in the next run | 2         |
| HPA/SiO <sub>2</sub>                             | 1.08                  | 1,4-dioxane | 250    | 6        | 91.2                              | 80.0                             | ~45% activity loss in the next run | 3         |
| WO <sub>x</sub> /ZrO <sub>2</sub>                | 0.80                  | hexadecane  | 250    | 6        | 60.0                              | 46.0                             | stable                             | 4         |
| SAA-57                                           | 0.73                  | 1,4-dioxane | 250    | 6        | 90.0                              | 60.0                             | stable                             | 5         |
| HY                                               | 2.35                  | n-heptane   | 250    | 6        | 95.0                              | 57.0                             | stable                             | 6         |
| SAPO-34                                          | 1.00                  | n-hexane    | 250    | 24       | 61.4                              | 33.1                             | stable                             | 7         |
| WO <sub>3</sub> /SBA-15                          | 1.35                  | n-heptane   | 250    | 24       | 64.4                              | 51.1                             | stable                             | 8         |
| H-ZSM-5                                          | 3.00                  | n-octane    | 250    | 24       | 90.0                              | 63.7                             | stable                             | 9         |
| SA-60                                            | 2.35                  | n-heptane   | 250    | 24       | 96.8                              | 75.0                             | stable                             | 10        |
| MFI zeolite                                      | 2.35                  | n-heptane   | 250    | 9        | 55.7                              | 39.6                             | stable                             | 11        |
|                                                  |                       |             | 250    | 24       | 89.1                              | 75.8                             | stable                             | 11        |
| NSP-BEA                                          | 2.35                  | n-heptane   | 250    | 9        | 88.4                              | 62.4                             | stable                             | 12        |
|                                                  |                       |             | 250    | 24       | 99.3                              | 79.4                             | stable                             | 12        |
| H-BEA                                            | 1.00                  | n-heptane   | 250    | 6        | 81.5                              | 69.2                             | stable                             | 13        |
|                                                  |                       |             | 250    | 24       | 99.0                              | 90.0                             | stable                             | 13        |
| SnOP                                             | 1.04                  | n-heptane   | 250    | 18       | 99.7                              | 93.0                             | stable                             | 14        |

<sup>a</sup> X<sub>DMF</sub> = DMF conversion; <sup>b</sup>Y<sub>PX</sub> = PX yield.

## References

- [1] X. Feng, C. Shen, C. Tian and T. Tan, *Ind. Eng. Chem. Res.*, 2107, 56, 5852-5859.
- [2] H. Kim and J. Jae, *Catalysts*, 2021, 9, 1074-1085.
- [3] Y. Philip, H. Pandu, Y. Park, D. Jin, H. Lee, J. Ha and J. Jae, *Catal. Today*, 2107, 293, 167-175.
- [4] D. Wang, C.M. Osmundsen, E. Taarning and J.A. Dumesic, *ChemCatChem*, 2103, 5, 2044-2050.
- [5] Y.P. Wijaya, D.J. Suh and J. Jae, *Catal. Commun.*, 2015, 70, 12-16.
- [6] P. T. M. Do, J. R. McAtee, D. A. Watson and R. F. Lobo, *ACS Catal.*, 2013, (3), 41-46.
- [7] Z. Gao, Y. Feng, L. Zhang, X. Zeng, Y. Sun, X. Tang, T. Lei and L. Lin, *ChemistrySelect*, 2020, 5, 2449-2454.
- [8] X. Feng, C. Shen, K. Ji, J. Yin and T. Tan, *Catal. Sci. Technol.*, 2017, 7, 5540-5549.
- [9] J. McGlone, P. Prieckel, L. Da Vià and L. Majdal, J.A. Lopez-Sanchez, *Catalysts*, 2018, 8, 253-270.
- [10] J.S. Lee, S.Y Kim, T.W Kim, S.Y Jeong, C.U. Kim, K.Y Lee and J. Nanosci. *Nanotechnology*, 2017, 17, 2695-2699.
- [11] J.C. Kim, T.W. Kim, Y. Kim, R. Ryoo, S.Y. Jeong and C.U. Kim, *Appl. Catal. B Environ.*, 2017, 206, 490-500.
- [12] T.W. Kim, S.Y. Kim, J.C. Kim, Y. Kim, R. Ryoo and C.U. Kim, *Appl. Catal. B Environ.*, 2016, 185, 100-109.
- [13] C.C. Chang, S.K. Green, C.L. Williams, P.J. Dauenhauer and W. Fan, *Green Chem.*, 2014, 16, 585-588.
- [14] X. Feng, Z. Cui, K. Ji, C. Shen and T. Tan, *Appl. Catal. B Environ.*, 2019, 259, 118108-118120.
